# Supplementary material for: Correlates of Prenatal and Early-Life Tobacco Smoke Exposure and Frequency of Common Gene Deletions in Childhood Acute Lymphoblastic Leukemia
Source: Oxford University Press journal article supplement (doi:10.1158/0008-5472.can-16-2571), 2017-02-15
Supplement: 00085472can162571-sup-170758_1_supp_3787879_hhlm2h.xlsx [file 00085472can162571-sup-170758_1_supp_3787879_hhlm2h.xlsx]

## Sheet: Sheet1
Table S3. Association analyses between tobacco smoke exposures and the number of deletions in the child’s leukemia using multivariable Poisson regressions, stratified by B-ALL and cytogenetic subtypes ETV6-RUNX1 fusion and high hyperdiploidy.
Binary exposures	B-ALL (# cases)	RM	95% CI	P-value	ETV6-RUNX1 (# cases)	RM	95% CI	P-value	HD-ALL (# cases)	RM	95% CI	P-value
Paternal, ever†
No	282	1 (ref)			62	1 (ref)			89	1 (ref)
Yes	193	1.18	(0.99, 1.42)	0.07	48	1.4	(1.01, 1.92)	0.04*	60	1.25	(0.72-2.17)	0.42
Maternal, ever†
No	391	1 (ref)			83	1 (ref)			118	1 (ref)
Yes	104	1.27	(1.04, 1.56)	0.02*	31	1.25	(0.88, 1.76)	0.21	37	1.21	(0.67-2.18)	0.52
Paternal, preconception
No	351	1 (ref)			77	1 (ref)			118	1 (ref)
Yes	123	1.25	(1.02, 1.52)	0.03*	33	1.18	(0.82, 1.70)	0.36	30	1.27	(0.67-2.41)	0.47
Maternal, preconception
No	431	1 (ref)			94	1 (ref)			133	1 (ref)
Yes	64	1.38	(1.08, 1.77)	0.01*	20	1.46	(0.98, 2.17)	0.06	22	1.12	(0.53-2.34)	0.77
Maternal, pregnancy
No	454	1 (ref)			100	1 (ref)			143	1 (ref)
Yes	41	1.55	(1.17, 2.05)	0.002*	14	1.63	(1.06, 2.51)	0.03*	12	0.84	(0.30-2.40)	0.75
Child, postnatal passive
No	386	1 (ref)			81	1 (ref)			127	1 (ref)
Yes	103	1.4	(1.14, 1.71)	0.001*	31	1.33	(0.94, 1.88)	0.1	27	1.45	(0.78-2.71)	0.25
Maternal, breastfeeding
No	480	1 (ref)			105	1 (ref)			153	1 (ref)
Yes	15	2.23	(1.55, 3.21)	<.0001*	9	1.68	(1.04, 2.72)	0.04*	2	1.26	(0.16-10.18)	0.83
Continuous exposures	# B-ALL cases	RM	95% CI	P-value	# ETV6-RUNX1 cases	RM	95% CI	P-value	# HD-ALL cases	RM	95% CI	P-value
Paternal, preconception (CPD)	462	1.07	(1.01, 1.13)	0.03*	108	1.11	(1.00, 1.24)	0.04*	146	1.07	(0.88-1.31)	0.48
Maternal, preconception (CPD)	495	1.07	(0.98, 1.17)	0.11	114	1.17	(1.00, 1.36)	0.05	155	0.98	(0.74-1.29)	0.88
Maternal, pregnancy (CPD)	494	1.22	(1.00, 1.49)	0.05	114	1.31	(0.95, 1.81)	0.1	155	0.69	(0.27-1.75)	0.43
Maternal, breastfeeding (CPD)	473	1.76	(1.32, 2.35)	0.0001*	109	1.45	(0.93, 2.25)	0.1	149	2.24	(0.23-21.98)	0.49
P-values adjusted for age-at-diagnosis, sex, paternal age, and household education; CPD = cigarettes, pipes, or cigars per day in 5 unit increments.
RM = ratio of the means.
HD-ALL = high hyperdiploid ALL.
† Paternal and maternal “ever” smoking was defined as having smoked at least 100 cigarettes, pipes, or cigars before the child’s diagnosis. Additional binary variables only account for whether the mother or father smoked at all during the time period described.
* Significant at P<0.05
