# Supplementary material for: Correlates of Prenatal and Early-Life Tobacco Smoke Exposure and Frequency of Common Gene Deletions in Childhood Acute Lymphoblastic Leukemia
Source: Oxford University Press journal article supplement (doi:10.1158/0008-5472.can-16-2571), 2017-02-15
Supplement: 00085472can162571-sup-170758_1_supp_3787880_vvlm2v.xlsx [file 00085472can162571-sup-170758_1_supp_3787880_vvlm2v.xlsx]

## Sheet: Sheet1
Table S4. Number of cases with 0, 1, or ≥2 deletions in relation to the binary tobacco exposure variables.
Binary tobacco exposures	Overall	# Deletions
		0	1	≥2
	Cases n	n (%)	n (%)	n (%)
Paternal, ever
No	318	123 (63.7)	118 (61.8)	77 (52.4)
Yes	213	70 (36.3)	73 (38.2)	70 (47.6)
Maternal, ever
No	444	169 (82.4)	167 (85.6)	108 (70.1)
Yes	110	36 (17.6)	28 (14.4)	46 (29.9)
Paternal, preconception
No	397	152 (78.8)	145 (76.3)	100 (68.0)
Yes	133	41 (21.2)	45 (23.7)	47 (32.0)
Maternal, preconception
No	486	183 (89.3)	178 (91.3)	125 (81.2)
Yes	68	22 (10.7)	17 (8.7)	29 (18.8)
Maternal, pregnancy
No	510	191 (93.2)	186 (95.4)	133 (86.4)
Yes	44	14 (6.8)	9 (4.6)	21 (13.6)
Child, postnatal passive
No	435	168 (83.2)	166 (86.0)	101 (66.0)
Yes	113	34 (16.8)	27 (14.0)	52 (34.0)
Maternal, breastfeeding
No	538	204 (99.5)	190 (97.4)	144 (93.5)
Yes	16	1 (0.5)	5 (2.6)	10 (6.5)
