# Supplementary material for: Correlates of Prenatal and Early-Life Tobacco Smoke Exposure and Frequency of Common Gene Deletions in Childhood Acute Lymphoblastic Leukemia
Source: Oxford University Press journal article supplement (doi:10.1158/0008-5472.can-16-2571), 2017-02-15
Supplement: 00085472can162571-sup-170758_1_supp_3787881_33lm23.xlsx [file 00085472can162571-sup-170758_1_supp_3787881_33lm23.xlsx]

## Sheet: Sheet1
Table S5. Correlation matrix for the parental reported tobacco smoke exposure variables. P-values and correlation coefficients were calculated using the Spearman’s rank correlation coefficient test.
	Maternal ever	Maternal preconception	Maternal preconception (CPD)	Maternal pregnancy	Maternal pregnancy (CPD)	Maternal breastfeed	Maternal breastfeed (CPD)	Paternal ever	Paternal preconception	Paternal preconception (CPD)	Child postnatal passive
Maternal ever	1
Maternal preconception	0.71014	1
Maternal preconception (CPD)	0.70932	0.99724	1
Maternal pregnancy	0.57338	0.78524	0.78894	1
Maternal pregnancy (CPD)	0.56012	0.77136	0.77932	0.98634	1
Maternal breastfeed	0.31945	0.42819	0.43652	0.54726	0.56374	1
Maternal breastfeed (CPD)	0.36302	0.49813	0.50521	0.65006	0.67505	0.99986	1
Paternal ever	0.3058	0.3022	0.30612	0.27688	0.26738	0.12451	0.13438	1
Paternal preconception	0.29635	0.34202	0.34204	0.32324	0.31035	0.15267	0.16511	0.62005	1
Paternal preconception (CPD)	0.32684	0.3733	0.37462	0.3561	0.34288	0.16297	0.17315	0.60433	0.98869	1
Child postnatal passive	0.58353	0.62574	0.62551	0.54956	0.53635	0.3421	0.38227	0.36552	0.46726	0.50487	1
	Spearman correlation coefficient (rho)		P-values
	0 to 0.2		0.003 to 0.0001
	0.2 to 0.4		<0.0001
	0.4 to 0.6		<0.0001
	0.6 to 0.8		<0.0001
	0.8 to 1.0		<0.0001
	CPD = cigarettes per day
