# Supplementary material for: Correlates of Prenatal and Early-Life Tobacco Smoke Exposure and Frequency of Common Gene Deletions in Childhood Acute Lymphoblastic Leukemia
Source: Oxford University Press journal article supplement (doi:10.1158/0008-5472.can-16-2571), 2017-02-15
Supplement: 00085472can162571-sup-170758_1_supp_3787882_rrlm2r.xlsx [file 00085472can162571-sup-170758_1_supp_3787882_rrlm2r.xlsx]

## Sheet: Sheet1
Table S6. Association analyses between tobacco smoke exposures and the number of deletions in the child’s leukemia using multivariable Poisson regressions, with maternal smoking adjusted for paternal smoking and vice-versa.
Binary tobacco smoking exposures	# Cases	RM	95% CI	P-valuea
Paternal, everbc
No	313	1 (ref)
Yes	213	1.13	(0.95, 1.36)	0.17
Maternal, everbc
No	425	1 (ref)
Yes	101	1.24	(1.01, 1.53)	0.04 d
Paternal, preconceptionc
No	394	1 (ref)
Yes	133	1.21	(0.99, 1.48)	0.06
Maternal, preconceptionc
No	460	1 (ref)
Yes	65	1.27	(0.99, 1.65)	0.06
Maternal, pregnancyc
No	482	1 (ref)
Yes	43	1.4	(1.05, 1.87)	0.02 d
Maternal, breastfeedingc
No	509	1 (ref)
Yes	16	1.94	(1.34, 2.79)	0.0004 d
Continuous exposures	# Cases	RM	95% CI	P-value
Paternal, preconception (CPD)c	511	1.07	(1.00, 1.13)	0.03
Maternal, preconception (CPD)c	512	1.05	(0.95, 1.15)	0.34
Maternal, pregnancy (CPD)c	511	1.3	(1.00, 1.68)	0.048 d
Maternal, breastfeeding (CPD)c	493	1.6	(1.18, 2.17)	0.003 d
a P-values adjusted for age-at-diagnosis, sex, paternal age, and household education;
b Paternal and maternal “ever” smoking was defined as having smoked at least 100 cigarettes, pipes, or cigars before the child’s diagnosis. Additional binary variables only account for whether the mother or father smoked at all during the time period described.
c Paternal smoking ever also adjusted for maternal smoking ever, and vice versa. Paternal smoking during preconception also adjusted for maternal smoking prenatally (preconception and/or pregnancy, average of preconception/pregnancy for CPD). Maternal smoking during specific time periods also adjusted for paternal smoking during preconception.
d Significant at P<0.05.
RM = ratio of the means; CPD = cigarettes, pipes, or cigars per day in 5 unit increments.
