# Supplementary material for: Correlates of Prenatal and Early-Life Tobacco Smoke Exposure and Frequency of Common Gene Deletions in Childhood Acute Lymphoblastic Leukemia
Source: Oxford University Press journal article supplement (doi:10.1158/0008-5472.can-16-2571), 2017-02-15
Supplement: 00085472can162571-sup-170758_1_supp_3787883_kklm2k.xlsx [file 00085472can162571-sup-170758_1_supp_3787883_kklm2k.xlsx]

## Sheet: Sheet1
Table S7. Association analyses of joint effects of prenatal and postnatal tobacco smoke exposures on the number of deletions in the child’s leukemia using multivariable Poisson regressions.
Tobacco smoke exposure (binary)			# Cases	RM	95% CI	P-valueb
Paternal preconception	Maternal prenatal a	Child's postnatal passive
	Analysis 1: paternal preconception and maternal prenatal smoking
No	No		371	1 (ref)
Yes	No		91	1.21	(0.96, 1.51)	0.1
No	Yes		23	1.26	(0.84, 1.88)	0.26
Yes	Yes		42	1.55	(1.16, 2.07)	0.003c
	Analysis 2: paternal preconception and child's postnatal passive smoking
No		No	355	1 (ref)
Yes		No	62	1.19	(0.92, 1.55)	0.19
No		Yes	35	1.24	(0.90, 1.71)	0.19
Yes		Yes	67	1.48	(1.16, 1.88)	0.002c
	Analysis 3: maternal prenatal and child's postnatal passive smoking
	No	No	427	1 (ref)
	Yes	No	8	0.61	(0.23, 1.65)	0.33
	No	Yes	53	1.18	(0.90, 1.54)	0.23
	Yes	Yes	59	1.5	(1.18, 1.92)	0.001c
a maternal prenatal smoking includes maternal smoking during preconception and/or pregnancy.
b P-values adjusted for age-at-diagnosis, sex, paternal age, and household education.
c Significant at P<0.05.
RM = ratio of the means.
