# Supplementary material for: Correlates of Prenatal and Early-Life Tobacco Smoke Exposure and Frequency of Common Gene Deletions in Childhood Acute Lymphoblastic Leukemia
Source: Oxford University Press journal article supplement (doi:10.1158/0008-5472.can-16-2571), 2017-02-15
Supplement: 00085472can162571-sup-170758_1_supp_3787884_22lm22.xlsx [file 00085472can162571-sup-170758_1_supp_3787884_22lm22.xlsx]

## Sheet: Sheet1
Table S8. Association analyses stratified by sex between tobacco smoke exposures and the number of deletions in the child’s leukemia using multivariable Poisson regressions, the California Childhood Leukemia Study, 1995-2015.
Binary exposures	# Cases	RM	95% CI	P-value	#Male cases	RM	95% CI	P-value	#Female cases	RM	95% CI	P-value	P-interaction
Paternal, ever†
No	318	1 (ref)			181	1 (ref)			137	1 (ref)
Yes	213	1.18	(0.99, 1.40)	0.06	117	1.31	(1.05-1.63)	0.02*	96	1.02	(0.78-1.33)	0.88	0.16
Maternal, ever†
No	444	1 (ref)			252	1 (ref)			192	1 (ref)
Yes	110	1.31	(1.08, 1.59)	0.007*	61	1.54	(1.21-1.96)	<0.001*	49	1.01	(0.73-1.39)	0.95	0.04*
Paternal, preconception
No	397	1 (ref)			226	1 (ref)			171	1 (ref)
Yes	133	1.27	(1.05, 1.53)	0.01*	72	1.27	(0.99-1.63)	0.06	61	1.26	(0.95-1.69)	0.11	0.96
Maternal, preconception
No	486	1 (ref)			277	1 (ref)			209	1 (ref)
Yes	68	1.36	(1.07, 1.72)	0.01*	36	1.66	(1.25-2.21)	0.001*	32	0.96	(0.64-1.45)	0.86	0.03*
Maternal, pregnancy
No	510	1 (ref)			290	1 (ref)			220	1 (ref)
Yes	44	1.48	(1.12, 1.94)	0.009*	23	1.77	(1.27-2.46)	0.001*	21	1.08	(0.67-1.74)	0.74	0.09
Child, postnatal passive
No	435	1 (ref)			241	1 (ref)			194	1 (ref)
Yes	113	1.36	(1.12, 1.65)	0.002*	70	1.42	(1.12-1.80)	0.004*	43	1.26	(0.92-1.73)	0.15	0.56
Maternal, breastfeeding
No	538	1 (ref)			301	1 (ref)			237	1 (ref)
Yes	16	2.11	(1.48, 3.02)	<.0001*	12	2.35	(1.59-3.46)	<0.001*	4	1.35	(0.65-4.61)	0.51	0.24
Continuous exposures	# Cases	RM	95% CI	P-value	# Male cases	RM	95% CI	P-value	# Female cases	RM	95% CI	P-value	P-interaction
Paternal, preconception (CPD)	517	1.08	(1.02, 1.14)	0.009*	291	1.07	(1.00-1.15)	0.05*	226	1.09	(0.99-1.20)	0.09	0.84
Maternal, preconception (CPD)	554	1.07	(0.99, 1.17)	0.1	313	1.21	(1.08-1.36)	0.001*	241	0.94	(0.81-1.11)	0.48	0.007*
Maternal, pregnancy (CPD)	553	1.25	(1.00, 1.49)	0.05	313	1.24	(0.99-1.55)	0.06	240	1.16	(0.77-1.75)	0.48	0.79
Maternal, breastfeeding (CPD)	530	1.74	(1.30, 2.32)	0.0002*	302	1.85	(1.33-2.57)	<0.001*	228	1.46	(0.79-2.69)	0.23	0.49
P-values adjusted for age-at-diagnosis, sex, paternal age, and household education; CPD = cigarettes, pipes, or cigars per day in 5 unit increments.
RM = ratio of the means.
† Paternal and maternal “ever” smoking was defined as having smoked at least 100 cigarettes, pipes, or cigars before the child’s diagnosis. Additional binary variables only account for whether the mother or father smoked at all during the time period described.
* Significant at P<0.05
