# Supplementary material for: Correlates of Prenatal and Early-Life Tobacco Smoke Exposure and Frequency of Common Gene Deletions in Childhood Acute Lymphoblastic Leukemia
Source: Oxford University Press journal article supplement (doi:10.1158/0008-5472.can-16-2571), 2017-02-15
Supplement: 00085472can162571-sup-170758_1_supp_3787887_hhlm2h.xlsx [file 00085472can162571-sup-170758_1_supp_3787887_hhlm2h.xlsx]

## Sheet: Sheet1
Table S1. Number of deletions in each gene tested amongst 559 ALL cases from the CCLS, assessed by MLPA.
Case ID	ALL cell type	HD	ETV6-RUNX1	CDKN2A	ETV6	IKZF1	PAX5	RB1	BTG1	PAR1	EBF1	TOTAL
1	B	1	NA	0	0	0	0	0	0	0	0	0
2	B	0	0	1	0	0	0	0	0	0	0	1
3	B	0	NA	0	0	0	0	0	0	0	0	0
4	B	1	0	1	0	1	0	0	0	0	0	2
5	B	0	0	0	0	0	0	0	0	0	0	0
6	B	0	0	0	0	0	0	0	0	0	0	0
7	B	0	1	0	1	0	1	0	0	0	0	2
8	B	1	0	0	0	0	0	0	0	0	0	0
9	B	1	0	0	0	0	0	0	0	0	0	0
10	B	0	1	0	1	0	0	0	1	0	0	2
11	B	1	0	0	0	0	0	0	0	0	0	0
12	B	0	1	0	1	0	0	0	0	0	0	1
13	B	0	0	1	0	0	1	0	0	1	0	3
14	B	0	0	0	0	0	0	0	0	0	0	0
15	B	0	0	0	0	0	0	0	0	0	0	0
16	B	0	0	0	0	0	0	0	0	0	0	0
17	B	0	NA	0	0	0	0	0	0	0	0	0
18	B	0	0	1	1	0	1	0	0	0	0	3
19	B	0	0	1	1	1	1	0	0	0	0	4
20	B	1	1	0	0	0	0	0	0	0	0	0
21	B	0	0	0	0	0	0	0	0	0	0	0
22	B	1	0	0	0	0	0	0	0	0	0	0
23	B	0	0	0	0	1	0	0	0	0	0	1
24	B	0	0	0	0	0	0	0	0	0	0	0
25	B	0	1	1	0	0	0	0	1	0	0	2
26	B	1	0	0	0	0	0	0	0	0	0	0
27	B	0	1	0	1	0	0	0	0	0	0	1
28	B	0	0	0	0	1	0	0	1	0	0	2
29	B	1	0	0	0	0	0	0	0	0	0	0
30	B	1	0	0	0	0	0	0	0	0	0	0
31	B	0	1	0	1	0	0	0	0	0	0	1
32	B	1	0	1	0	0	0	0	0	0	0	1
33	B	1	0	1	0	0	0	0	0	0	0	1
34	B	0	1	0	0	0	0	0	0	0	0	0
35	B	0	1	0	1	0	1	0	0	0	0	2
36	B	0	1	1	0	0	0	0	0	0	0	1
37	B	1	0	0	0	0	0	0	0	0	0	0
38	B	1	NA	1	0	1	0	0	0	0	0	2
39	B	1	0	0	0	0	0	0	0	0	0	0
40	B	NA	NA	1	0	0	0	0	1	0	0	2
41	B	NA	NA	0	1	0	0	0	0	0	0	1
42	B	0	0	0	1	1	0	0	0	0	0	2
43	B	1	0	1	0	0	0	0	0	0	0	1
44	B	NA	NA	0	1	0	1	0	1	0	0	3
45	B	NA	NA	0	0	0	0	0	0	0	0	0
46	B	0	0	0	0	0	0	0	0	0	0	0
47	B	0	0	0	0	0	0	1	0	0	0	1
48	B	0	1	0	1	0	0	0	0	0	0	1
49	B	NA	NA	0	0	0	0	0	0	0	0	0
50	B	1	0	1	0	0	0	0	0	0	0	1
51	B	1	0	0	0	0	0	0	0	0	0	0
52	B	0	1	1	1	0	0	0	0	0	0	2
53	B	1	0	0	0	0	0	0	0	0	0	0
54	B	1	0	0	0	0	0	0	0	0	0	0
55	B	0	0	0	0	0	0	0	0	0	0	0
56	B	1	0	0	0	0	0	0	0	0	0	0
57	B	0	0	0	0	1	0	0	0	1	0	2
58	B	0	1	0	1	0	0	0	0	0	0	1
59	B	0	0	0	1	1	0	0	0	0	0	2
60	B	1	0	0	0	0	0	0	0	0	0	0
61	B	NA	NA	0	0	1	0	0	1	0	0	2
62	B	0	0	0	0	1	0	0	0	0	0	1
63	B	1	0	0	0	0	0	0	0	0	0	0
64	B	NA	NA	0	0	0	0	0	0	0	0	0
65	B	0	1	1	1	0	0	0	0	0	0	2
66	B	0	1	0	0	0	0	0	0	0	0	0
67	B	0	0	0	0	0	0	1	0	0	0	1
68	B	0	0	1	1	1	1	0	0	0	0	4
69	B	0	0	0	0	0	0	0	0	0	0	0
70	B	0	0	0	0	1	0	0	0	1	0	2
71	B	0	1	0	1	0	1	0	0	0	0	2
72	B	0	0	0	0	0	0	0	0	0	0	0
73	B	1	0	0	0	0	0	0	0	0	0	0
74	B	0	1	0	1	0	1	1	0	0	0	3
75	B	0	1	1	0	0	0	0	0	0	0	1
76	B	0	0	0	0	0	0	0	0	0	0	0
77	B	1	0	0	0	0	0	0	0	0	0	0
78	B	1	0	0	0	0	0	0	0	0	0	0
79	B	0	0	0	0	0	0	0	0	0	0	0
80	B	NA	1	0	0	0	0	0	0	0	0	0
81	B	0	0	0	1	0	0	0	0	0	0	1
82	B	0	0	0	0	0	1	0	0	0	0	1
83	B	NA	NA	0	0	0	0	0	0	0	0	0
84	B	1	0	0	0	0	0	0	0	0	0	0
85	B	1	0	0	0	0	0	0	0	0	0	0
86	B	1	0	0	0	0	0	0	0	0	0	0
87	B	0	0	0	0	0	0	0	0	0	0	0
88	B	0	0	0	0	1	0	0	0	0	0	1
89	B	1	0	0	0	0	0	0	0	0	0	0
90	B	0	0	0	1	1	0	0	0	0	0	2
91	B	0	1	0	1	0	0	0	1	0	0	2
92	B	0	0	0	0	0	1	0	0	0	0	1
93	B	0	0	0	0	0	0	0	0	0	0	0
94	B	0	0	0	0	0	0	0	0	0	0	0
95	B	1	0	0	0	0	0	0	0	0	0	0
96	B	0	0	0	1	0	0	0	0	0	0	1
97	B	0	1	0	0	0	0	0	0	0	0	0
98	B	0	1	0	1	0	0	0	0	0	0	1
99	B	1	0	0	0	0	0	0	0	0	0	0
100	B	0	1	0	1	0	0	0	0	0	0	1
101	B	1	0	0	0	0	0	0	0	0	0	0
102	B	0	1	0	0	0	0	1	1	0	0	2
103	B	0	0	1	1	1	0	1	0	0	0	4
104	B	1	0	1	0	0	0	0	0	0	0	1
105	B	0	0	1	0	0	0	0	0	0	0	1
106	B	0	0	0	1	1	0	0	0	0	0	2
107	B	0	0	1	0	0	1	0	0	0	0	2
108	B	NA	1	0	1	0	0	0	0	0	0	1
109	B	0	0	1	1	1	1	0	0	0	0	4
110	B	0	0	0	0	0	0	0	0	0	0	0
111	B	1	0	0	0	0	0	0	0	0	0	0
112	B	NA	NA	0	1	0	0	0	0	0	0	1
113	B	0	0	1	0	0	0	0	0	1	0	2
114	B	1	0	1	0	1	0	0	0	0	0	2
115	B	0	1	1	0	0	0	0	0	0	0	1
116	B	NA	0	0	0	0	0	0	0	0	0	0
117	B	NA	NA	0	0	0	0	0	0	0	0	0
118	B	0	1	0	1	0	0	0	1	0	0	2
119	B	1	0	0	0	0	0	0	0	1	0	1
120	B	0	0	0	0	1	0	0	0	1	0	2
121	B	1	0	0	0	0	0	0	0	0	0	0
122	B	0	0	0	0	1	0	1	0	0	0	2
123	B	0	1	0	1	0	0	0	0	0	0	1
124	B	0	0	0	0	0	0	0	0	0	0	0
125	B	0	0	1	0	0	0	0	0	0	0	1
126	B	0	0	0	0	0	0	0	0	0	0	0
127	B	1	0	0	0	0	0	0	0	0	0	0
128	B	1	0	0	0	0	0	0	0	0	0	0
129	B	0	0	0	0	0	0	0	0	0	0	0
130	B	0	1	1	0	0	0	0	0	0	0	1
131	B	0	0	0	1	1	0	0	0	0	0	2
132	B	0	0	0	0	1	1	1	0	0	0	3
133	B	0	0	1	0	0	1	0	0	0	0	2
134	B	0	1	0	0	0	0	0	0	0	0	0
135	B	0	0	0	0	1	0	0	0	0	0	1
136	B	0	1	0	1	0	0	0	0	0	1	2
137	B	0	0	0	0	1	0	0	0	0	0	1
138	B	0	1	0	1	0	0	0	0	0	0	1
139	B	0	1	0	1	0	0	0	1	0	0	2
140	B	0	0	0	0	0	0	0	0	0	0	0
141	B	0	0	0	0	1	0	1	0	1	0	3
142	B	NA	NA	0	0	0	0	0	0	0	0	0
143	B	0	1	0	0	0	0	0	0	0	0	0
144	B	0	0	1	0	1	1	1	0	0	0	4
145	B	0	0	1	0	0	0	0	0	0	0	1
146	B	1	0	0	0	0	0	0	0	0	0	0
147	B	NA	NA	0	1	0	0	0	0	0	0	1
148	B	0	0	0	0	0	0	0	0	0	0	0
149	B	0	0	1	0	0	0	0	0	0	0	1
150	B	0	0	0	0	0	0	0	0	0	0	0
151	B	0	0	0	0	1	0	0	0	0	0	1
152	B	0	1	0	0	0	1	0	1	0	0	2
153	B	1	0	0	0	0	1	0	0	0	0	1
154	B	0	0	0	0	0	1	0	0	0	0	1
155	B	0	0	0	0	0	0	0	0	0	0	0
156	B	0	1	1	1	0	0	0	1	0	0	3
157	B	0	1	0	1	0	1	1	0	0	0	3
158	B	1	0	1	0	0	0	0	0	0	0	1
159	B	0	0	1	0	0	1	0	0	0	0	2
160	B	0	1	0	1	0	0	0	0	0	0	1
161	B	NA	1	1	1	0	1	0	0	0	0	3
162	B	0	0	0	0	1	0	0	0	1	0	2
163	B	0	0	0	0	0	0	0	0	0	0	0
164	B	0	1	0	1	0	0	0	0	0	0	1
165	B	1	0	0	0	0	0	0	0	0	0	0
166	B	0	0	0	0	0	0	0	0	0	0	0
167	B	NA	0	0	0	1	0	0	0	0	0	1
168	B	0	0	1	0	0	1	0	0	0	0	2
169	B	NA	NA	0	0	0	1	0	0	0	0	1
170	B	1	0	0	1	0	0	0	0	0	0	1
171	B	1	0	0	0	0	0	0	0	1	0	1
172	B	0	1	0	1	0	0	0	0	0	0	1
173	B	0	1	0	0	0	0	0	0	0	0	0
174	B	NA	NA	1	0	1	0	0	0	0	0	2
175	B	1	0	0	0	0	0	0	0	0	0	0
176	B	1	0	1	0	0	0	0	0	0	0	1
177	B	0	0	0	0	0	0	0	0	0	0	0
178	B	0	0	0	0	0	0	0	0	0	0	0
179	B	0	1	0	0	0	0	1	0	0	1	2
180	B	1	0	0	0	0	0	0	0	0	0	0
181	B	1	0	0	0	0	0	0	0	0	0	0
182	B	0	1	1	0	0	0	0	0	0	0	1
183	B	NA	NA	1	0	0	1	0	0	0	0	2
184	B	1	0	0	0	0	0	0	0	0	0	0
185	B	0	1	0	0	0	0	0	1	0	0	1
186	B	1	0	0	0	0	0	0	0	0	0	0
187	B	1	0	0	0	1	0	0	0	0	0	1
188	B	0	0	0	0	0	0	0	0	1	0	1
189	B	0	1	0	1	1	1	0	0	0	0	3
190	B	0	0	1	0	1	1	0	0	0	0	3
191	B	0	0	0	0	0	0	0	0	0	0	0
192	B	1	0	0	0	0	0	0	0	0	0	0
193	B	1	0	1	0	0	0	0	0	0	0	1
194	B	0	0	1	0	0	1	0	0	0	0	2
195	B	NA	NA	1	0	0	1	0	0	0	0	2
196	B	1	0	0	0	0	1	0	0	0	0	1
197	B	1	0	0	0	0	0	0	0	1	0	1
198	B	1	0	0	0	0	0	0	0	0	0	0
199	B	0	1	0	0	0	1	0	0	0	0	1
200	B	1	0	0	0	0	0	0	0	0	0	0
201	B	0	0	0	0	0	0	0	0	0	0	0
202	B	0	0	0	0	1	0	1	0	0	0	2
203	B	1	0	0	0	0	0	0	0	0	0	0
204	B	1	0	1	0	1	1	0	0	0	0	3
205	B	0	1	0	1	0	0	0	1	0	0	2
206	B	0	1	1	1	0	0	0	0	0	0	2
207	B	0	0	0	0	0	0	0	0	0	0	0
208	B	0	0	0	1	0	0	0	0	0	0	1
209	B	1	0	1	0	0	0	0	0	0	0	1
210	B	0	0	0	0	0	0	0	0	1	0	1
211	B	1	0	0	0	0	0	0	0	0	0	0
212	B	0	1	0	0	0	0	0	0	0	0	0
213	B	0	0	0	0	1	0	0	1	0	0	2
214	B	0	0	1	0	1	0	0	1	0	0	3
215	B	0	1	1	1	0	0	0	0	0	0	2
216	B	1	0	0	0	0	0	0	0	0	0	0
217	B	1	0	0	0	0	0	0	0	0	0	0
218	B	0	1	0	1	0	0	0	1	0	0	2
219	B	0	0	0	0	1	0	0	0	0	0	1
220	B	0	0	1	0	0	0	0	0	0	0	1
221	B	0	0	1	0	0	1	0	0	0	0	2
222	B	0	0	0	0	0	1	0	0	0	0	1
223	B	1	NA	1	0	0	0	0	0	0	0	1
224	B	NA	NA	1	0	0	0	0	0	0	0	1
225	B	0	1	0	1	0	0	0	0	0	0	1
226	B	0	0	0	0	1	0	0	0	1	0	2
227	B	0	1	1	1	0	0	1	1	0	1	5
228	B	0	1	0	0	0	0	0	0	0	0	0
229	B	0	0	1	0	0	0	0	0	1	0	2
230	B	1	0	0	0	0	0	0	0	0	0	0
231	B	1	0	0	0	0	0	0	0	0	0	0
232	B	0	1	1	0	0	0	0	1	0	0	2
233	B	0	0	0	0	1	0	0	0	0	0	1
234	B	0	0	0	0	0	0	0	0	0	0	0
235	B	1	0	0	0	0	0	0	0	0	0	0
236	B	0	0	0	0	0	0	0	0	0	0	0
237	B	0	NA	0	0	0	1	0	0	0	0	1
238	B	1	0	0	0	1	0	0	0	0	0	1
239	B	0	0	1	0	0	0	0	1	0	0	2
240	B	1	0	0	1	0	0	0	0	0	0	1
241	B	0	0	1	1	0	1	0	0	0	0	3
242	B	0	0	0	0	0	0	0	0	1	0	1
243	B	0	1	0	1	0	1	0	0	0	0	2
244	B	0	1	0	0	0	0	0	0	0	0	0
245	B	NA	NA	1	0	0	0	0	0	0	0	1
246	B	NA	NA	1	0	0	0	0	0	0	0	1
247	B	1	0	1	0	0	0	0	0	0	0	1
248	B	1	0	0	0	0	1	0	0	0	0	1
249	B	0	0	1	0	0	0	0	0	0	0	1
250	B	1	0	0	0	0	0	0	0	0	0	0
251	B	0	1	0	0	0	1	0	0	0	0	1
252	B	0	0	1	0	0	0	0	0	0	0	1
253	B	1	0	0	1	0	0	0	0	0	0	1
254	B	0	1	0	1	0	0	0	0	0	0	1
255	B	1	0	0	0	0	0	0	0	0	0	0
256	B	0	0	1	0	1	1	1	0	0	0	4
257	B	NA	NA	1	0	1	0	0	0	0	0	2
258	B	0	0	0	0	0	0	1	0	0	0	1
259	B	0	1	0	1	0	1	0	1	0	0	3
260	B	0	1	0	0	0	0	0	0	0	0	0
261	B	0	1	0	0	0	0	0	0	0	0	0
262	B	NA	0	0	1	0	1	0	0	0	0	2
263	B	0	0	1	0	1	0	0	1	0	0	3
264	B	0	0	0	1	0	0	0	0	0	0	1
265	B	0	1	0	0	0	0	0	0	0	0	0
266	B	1	0	1	0	0	0	0	0	0	0	1
267	B	0	0	0	0	0	1	0	0	0	0	1
268	B	1	0	0	0	0	0	0	0	0	0	0
269	B	1	0	1	0	0	0	0	0	0	0	1
270	B	NA	NA	0	0	0	1	0	0	0	0	1
271	B	0	0	0	0	1	0	0	0	0	0	1
272	B	1	0	0	0	0	0	0	0	0	0	0
273	B	0	1	1	1	0	0	0	0	0	0	2
274	B	0	0	1	0	0	0	0	0	0	0	1
275	B	0	0	0	0	0	0	1	0	0	0	1
276	B	0	NA	0	0	0	0	1	0	0	0	1
277	B	1	0	0	0	0	0	0	0	0	0	0
278	B	0	0	1	0	0	1	0	0	0	0	2
279	B	0	0	0	0	1	1	0	0	0	0	2
280	B	0	0	0	0	0	0	0	0	1	0	1
281	B	0	1	1	0	0	1	0	0	0	0	2
282	B	0	0	0	1	0	0	0	0	1	0	2
283	B	0	0	0	1	0	0	0	0	0	0	1
284	B	0	0	0	0	1	0	0	0	0	0	1
285	B	0	1	0	1	0	0	0	0	0	0	1
286	B	0	1	0	0	0	1	0	0	0	0	1
287	B	0	0	0	0	1	0	0	0	0	0	1
288	B	0	0	1	0	1	1	1	0	0	0	4
289	B	1	0	0	0	0	0	0	0	0	0	0
290	B	0	0	1	0	0	1	0	0	0	0	2
291	B	1	0	0	0	0	0	0	0	0	0	0
292	B	0	0	0	0	0	0	0	0	0	0	0
293	B	0	1	0	1	0	0	1	1	0	0	3
294	B	0	0	0	0	0	0	0	0	0	0	0
295	B	0	1	0	1	0	0	0	0	0	0	1
296	B	0	0	0	1	0	0	0	0	1	0	2
297	B	1	0	0	0	0	0	0	0	0	0	0
298	B	0	1	0	1	1	1	0	0	0	0	3
299	B	1	0	0	0	0	0	0	0	0	0	0
300	B	0	0	0	0	1	0	0	0	0	0	1
301	B	1	0	1	0	0	0	0	0	0	0	1
302	B	0	0	0	0	0	0	0	0	0	0	0
303	B	0	0	1	0	0	0	0	0	0	0	1
304	B	0	0	1	0	0	1	0	0	0	0	2
305	B	1	0	0	0	0	0	0	0	0	0	0
306	B	0	0	1	0	0	0	0	0	0	0	1
307	B	1	0	0	0	0	0	0	0	0	0	0
308	B	1	0	1	0	0	0	0	0	0	0	1
309	B	0	0	0	0	0	0	0	0	0	0	0
310	B	0	0	1	0	1	1	0	1	1	0	5
311	B	0	1	0	0	0	1	0	0	0	0	1
312	B	1	0	0	0	0	0	0	0	0	0	0
313	B	0	1	0	0	0	0	0	0	0	1	1
314	B	1	0	0	0	0	1	0	0	0	0	1
315	B	1	0	0	0	0	0	0	0	0	0	0
316	B	0	0	0	0	1	1	0	0	0	0	2
317	B	0	0	0	0	0	0	0	0	0	0	0
318	B	0	0	1	0	0	0	0	0	1	0	2
319	B	1	0	0	0	0	0	0	0	0	0	0
320	B	1	0	0	0	0	0	0	0	0	0	0
321	B	0	0	1	1	0	0	0	0	0	0	2
322	B	0	0	1	0	0	0	0	0	0	0	1
323	B	1	0	0	0	0	0	0	0	0	0	0
324	B	0	1	0	1	0	1	1	0	0	0	3
325	B	0	1	0	0	1	1	0	1	0	0	3
326	B	1	0	0	0	0	0	0	0	0	0	0
327	B	1	0	0	0	0	0	0	0	0	0	0
328	B	0	1	1	0	0	0	0	1	0	0	2
329	B	0	1	1	1	0	0	0	0	0	0	2
330	B	0	0	1	0	0	0	0	0	0	0	1
331	B	0	0	0	0	1	1	0	0	0	0	2
332	B	0	1	0	0	0	0	0	0	0	0	0
333	B	0	0	1	0	0	0	0	0	0	0	1
334	B	0	0	0	0	0	0	0	0	0	0	0
335	B	0	1	1	1	0	0	0	0	0	0	2
336	B	1	0	0	0	0	0	1	0	0	0	1
337	B	0	NA	0	1	0	1	0	0	0	0	2
338	B	1	1	0	0	0	0	0	0	0	0	0
339	B	1	0	0	0	0	0	0	0	0	0	0
340	B	0	0	0	0	0	0	0	0	1	0	1
341	B	0	NA	0	1	0	0	0	0	0	0	1
342	B	0	0	1	0	0	1	0	0	0	0	2
343	B	1	0	0	0	0	0	0	0	0	0	0
344	B	NA	NA	0	1	0	1	0	0	0	0	2
345	B	1	0	0	0	0	0	0	0	0	0	0
346	B	0	0	0	0	1	0	0	0	0	0	1
347	B	1	0	0	0	0	0	0	0	0	0	0
348	B	0	0	0	0	0	0	0	0	0	0	0
349	B	1	0	0	0	0	0	0	0	0	0	0
350	B	0	NA	0	0	1	0	0	0	0	0	1
351	B	1	0	0	0	0	0	0	0	0	0	0
352	B	0	0	0	0	0	0	0	0	1	0	1
353	B	1	NA	0	0	0	0	0	0	0	0	0
354	B	0	0	0	0	0	0	0	1	1	0	2
355	B	0	NA	1	0	0	0	0	0	0	0	1
356	B	1	0	0	0	0	0	0	0	0	0	0
357	B	0	0	0	1	0	0	0	0	0	0	1
358	B	1	0	0	0	0	0	0	0	0	0	0
359	B	0	0	0	0	1	0	0	1	0	0	2
360	B	0	1	0	0	0	0	0	0	0	0	0
361	B	1	0	0	1	0	0	0	0	0	0	1
362	B	0	0	0	0	0	1	0	0	0	0	1
363	B	0	0	0	0	0	0	0	0	0	0	0
364	B	1	0	0	0	0	0	0	0	0	0	0
365	B	1	0	0	0	0	0	0	0	0	0	0
366	B	0	1	0	0	0	1	1	0	0	0	2
367	B	NA	NA	0	0	0	0	0	0	0	0	0
368	B	1	0	0	0	0	1	0	0	0	0	1
369	B	0	1	0	1	0	0	0	0	0	0	1
370	B	0	1	0	1	0	0	0	0	0	0	1
371	B	1	0	0	0	0	0	0	0	0	0	0
372	B	0	0	0	0	1	0	1	0	0	0	2
373	B	0	NA	1	0	1	1	0	0	0	0	3
374	B	1	0	1	0	0	1	0	0	0	0	2
375	B	1	0	0	0	0	0	0	0	0	0	0
376	B	1	0	0	0	0	0	0	0	0	0	0
377	B	1	0	0	0	0	0	0	0	0	0	0
378	B	1	0	0	0	0	0	0	0	0	0	0
379	B	0	1	0	1	0	1	0	0	0	0	2
380	B	0	NA	0	0	0	0	0	0	0	0	0
381	B	1	0	0	0	0	0	0	0	0	0	0
382	B	0	0	0	0	1	0	0	1	1	0	3
383	B	0	1	0	1	0	0	0	0	0	0	1
384	B	0	0	1	0	0	1	0	0	0	0	2
385	B	0	0	0	0	0	0	0	0	0	0	0
386	B	NA	NA	0	0	0	0	0	0	0	0	0
387	B	0	1	1	0	0	0	0	0	0	0	1
388	B	1	0	0	0	0	0	0	0	0	0	0
389	B	1	0	0	0	0	0	0	0	0	0	0
390	B	0	0	1	1	0	0	0	0	0	0	2
391	B	0	0	1	0	0	1	0	0	0	0	2
392	B	1	0	1	0	0	1	0	0	0	0	2
393	B	0	1	0	1	0	1	0	0	0	0	2
394	B	0	1	0	0	0	1	0	0	0	0	1
395	B	0	0	1	0	0	1	0	0	0	0	2
396	B	0	1	1	1	0	1	0	0	1	0	4
397	B	NA	NA	1	1	0	0	0	0	0	0	2
398	B	0	0	1	0	0	0	0	0	0	0	1
399	B	NA	NA	1	0	0	1	0	0	0	0	2
400	B	0	1	0	1	0	0	0	0	0	0	1
401	B	1	0	0	0	0	0	0	0	0	0	0
402	B	0	1	0	1	0	0	0	0	0	0	1
403	B	NA	NA	0	0	0	1	0	0	0	0	1
404	B	1	0	0	0	0	0	0	0	0	0	0
405	B	0	1	1	1	0	1	0	0	0	0	3
406	B	0	0	0	0	1	0	0	1	0	1	3
407	B	1	0	0	0	0	0	0	0	0	0	0
408	B	1	0	0	0	0	0	0	0	0	0	0
409	B	0	0	0	0	1	0	0	0	0	0	1
410	B	1	0	0	0	1	0	0	0	0	0	1
411	B	0	0	1	0	0	1	0	0	0	0	2
412	B	0	0	1	0	0	0	0	0	0	0	1
413	B	0	1	0	1	0	0	0	0	0	0	1
414	B	0	1	0	1	0	0	0	0	0	1	2
415	B	0	0	1	0	0	0	0	0	0	0	1
416	B	0	0	0	1	0	0	0	0	0	0	1
417	B	1	0	0	0	0	0	1	0	0	0	1
418	B	0	0	0	0	0	0	0	0	0	0	0
419	B	0	1	0	1	0	0	0	0	0	0	1
420	B	0	0	1	0	0	1	1	0	0	0	3
421	B	0	0	0	0	1	0	0	0	0	0	1
422	B	1	0	0	0	0	0	0	0	0	0	0
423	B	0	1	0	0	0	0	0	0	0	0	0
424	B	0	1	0	0	0	0	1	0	0	0	1
425	B	0	0	0	0	1	0	0	0	0	0	1
426	B	0	0	1	0	0	0	1	0	0	0	2
427	B	1	0	1	0	0	0	0	0	0	0	1
428	B	0	1	0	0	0	1	0	0	0	0	1
429	B	1	0	0	0	0	0	0	0	0	0	0
430	B	0	0	1	0	1	0	0	0	1	0	3
431	B	0	1	0	0	0	1	0	0	0	0	1
432	B	0	NA	1	0	0	0	0	0	0	0	1
433	B	1	0	0	1	0	0	0	0	0	0	1
434	B	1	0	0	0	0	0	0	0	0	0	0
435	B	0	0	0	1	0	0	0	0	0	0	1
436	B	0	0	0	0	0	0	0	0	0	0	0
437	B	0	0	1	0	0	0	1	0	1	0	3
438	B	1	0	0	0	0	0	0	0	0	0	0
439	B	0	0	0	0	0	0	0	0	0	0	0
440	B	0	0	0	0	0	0	0	0	0	0	0
441	B	0	0	0	0	1	1	1	0	1	0	4
442	B	0	1	0	1	0	0	1	0	0	0	2
443	B	NA	1	1	1	0	1	1	1	0	0	5
444	B	0	1	0	1	0	0	0	0	0	0	1
445	B	0	0	1	0	1	1	0	0	0	0	3
446	B	0	0	0	1	1	1	0	0	0	0	3
447	B	0	0	0	0	1	0	0	0	0	0	1
448	B	0	0	1	0	0	1	0	1	0	0	3
449	B	1	0	0	1	0	0	0	0	0	0	1
450	B	1	0	0	0	0	0	0	0	0	0	0
451	B	0	0	1	0	0	0	0	0	0	0	1
452	B	NA	NA	0	0	0	0	0	0	0	0	0
453	B	1	0	0	0	0	0	0	0	0	0	0
454	B	1	0	0	0	0	0	0	0	0	0	0
455	B	1	0	0	0	0	0	0	0	0	0	0
456	B	0	0	1	0	0	0	0	0	0	0	1
457	B	1	0	0	0	0	0	0	0	0	0	0
458	B	1	0	0	0	0	0	0	0	0	0	0
459	B	NA	NA	0	0	0	0	0	0	0	0	0
460	B	0	0	0	0	0	0	0	0	0	0	0
461	B	0	1	0	1	0	1	0	0	0	0	2
462	B	0	1	1	1	0	0	1	1	1	0	5
463	B	0	1	0	0	0	0	0	0	0	0	0
464	B	0	1	1	1	0	0	0	0	0	0	2
465	B	0	1	0	1	0	0	0	0	0	0	1
466	B	0	1	0	0	0	0	0	1	0	0	1
467	B	1	0	1	0	0	1	0	0	0	0	2
468	B	1	0	1	0	0	0	0	0	0	0	1
469	B	1	0	1	0	0	0	0	0	0	0	1
470	B	0	0	0	1	1	0	0	0	0	0	2
471	B	0	1	0	0	0	1	0	0	0	0	1
472	B	0	1	0	1	0	0	0	0	0	0	1
473	B	0	0	0	0	1	0	0	0	0	0	1
474	B	0	1	0	1	0	0	0	0	0	0	1
475	B	0	NA	0	0	1	0	0	0	0	0	1
476	B	NA	0	0	0	0	0	0	0	0	0	0
477	B	1	0	0	0	0	0	0	0	0	0	0
478	B	0	0	1	0	1	0	0	0	0	0	2
479	B	0	1	0	1	0	0	0	0	0	0	1
480	B	0	0	0	1	1	1	0	0	0	0	3
481	B	0	0	0	0	0	0	0	0	0	0	0
482	B	1	0	0	1	0	0	0	0	0	0	1
483	B	0	0	0	0	1	0	0	1	0	0	2
484	B	1	0	0	0	0	0	0	0	0	0	0
485	B	1	0	0	0	0	0	0	0	0	0	0
486	B	0	NA	0	0	0	0	0	0	0	0	0
487	B	0	0	0	0	1	1	0	0	0	0	2
488	B	0	1	0	0	0	0	1	1	0	0	2
489	B	1	0	0	0	0	0	0	0	0	0	0
490	B	1	0	0	0	0	0	0	0	0	0	0
491	B	1	0	0	0	0	0	0	0	0	0	0
492	B	0	0	1	0	1	0	0	0	0	0	2
493	B	0	1	0	1	0	0	1	0	0	0	2
494	B	0	1	0	1	0	0	0	0	0	0	1
495	B	1	0	0	0	0	0	0	0	0	0	0
496	B	1	0	0	0	0	0	0	0	0	0	0
497	B	0	0	1	0	0	1	0	0	0	0	2
498	B	0	0	1	0	1	1	0	1	0	0	4
499	B	0	0	0	0	0	0	0	0	0	0	0
500	B	0	0	0	0	0	0	0	0	0	0	0
501	NA	NA	NA	0	0	0	0	0	0	0	0	0
502	NA	NA	NA	0	0	1	0	0	0	0	0	1
503	NA	NA	NA	0	1	0	0	0	0	0	0	1
504	NA	0	0	0	0	0	1	0	0	0	0	1
505	NA	NA	NA	0	0	0	0	0	0	1	0	1
506	NA	NA	NA	0	0	0	0	0	0	0	0	0
507	NA	NA	NA	0	0	1	0	0	0	0	0	1
508	NA	NA	NA	0	0	0	0	0	0	0	0	0
509	NA	NA	NA	1	1	0	0	1	1	0	0	4
510	NA	1	0	1	0	0	0	0	0	0	0	1
511	NA	NA	NA	0	1	0	0	0	0	0	0	1
512	NA	NA	NA	1	0	1	0	0	0	1	0	3
513	NA	NA	NA	0	1	0	0	0	0	0	0	1
514	T	0	0	1	0	0	0	0	0	0	0	1
515	T	0	0	1	0	0	0	0	0	0	0	1
516	T	0	0	0	0	0	0	0	0	0	0	0
517	T	0	0	1	0	0	1	0	0	0	0	2
518	T	1	0	0	0	0	0	0	0	0	0	0
519	T	0	0	1	0	0	0	0	0	0	0	1
520	T	0	0	1	0	0	0	0	0	0	0	1
521	T	0	0	0	0	0	0	0	0	0	0	0
522	T	0	0	1	0	0	0	0	0	0	0	1
523	T	0	0	1	0	0	0	0	0	0	0	1
524	T	0	0	1	0	0	0	0	0	0	0	1
525	T	0	0	0	0	0	0	0	0	0	0	0
526	T	0	0	0	0	0	0	0	0	0	0	0
527	T	0	0	1	0	0	0	0	0	0	0	1
528	T	0	0	1	0	0	0	0	0	0	0	1
529	T	NA	NA	1	0	0	0	1	0	0	0	2
530	T	0	0	1	0	0	0	0	0	0	0	1
531	T	0	0	1	0	0	0	0	0	0	0	1
532	T	0	0	1	0	0	0	0	0	0	0	1
533	T	0	0	1	0	0	1	0	0	0	0	2
534	T	0	0	0	0	0	0	0	0	0	0	0
535	T	0	0	1	0	0	0	1	0	0	0	2
536	T	0	0	0	0	0	0	0	0	0	0	0
537	T	0	0	1	0	0	0	0	0	0	0	1
538	T	0	0	0	1	0	0	0	0	0	0	1
539	T	0	0	0	0	0	0	0	0	0	0	0
540	T	0	0	1	0	0	0	0	0	0	0	1
541	T	0	0	1	0	0	0	0	0	0	0	1
542	T	NA	NA	0	0	0	0	0	0	0	0	0
543	T	0	0	1	1	0	1	1	0	0	1	5
544	T	0	0	1	0	0	0	0	0	0	0	1
545	T	0	0	1	0	0	0	0	0	0	0	1
546	T	0	0	1	0	0	0	0	0	0	0	1
547	T	0	0	1	0	0	0	0	0	0	0	1
548	T	1	0	1	0	0	1	0	0	0	0	2
549	T	0	0	0	1	0	0	0	0	0	1	2
550	T	0	0	1	1	0	0	0	0	1	0	3
551	T	0	0	1	0	0	0	0	0	0	0	1
552	T	0	0	1	0	0	0	0	0	0	0	1
553	T	0	0	1	0	0	0	0	0	0	0	1
554	T	0	0	0	0	0	0	0	0	0	0	0
555	T	0	0	0	0	0	0	0	0	0	0	0
556	T	0	0	1	0	0	0	1	0	0	0	2
557	T	0	0	0	0	0	0	0	0	0	0	0
558	T	0	0	1	0	0	0	0	0	0	0	1
559	T	NA	NA	1	0	0	0	0	0	0	0	1
